# Supplementary material for: Lipopolysaccharide Impedes Bone Repair in FcγRIIB-Deficient Mice
Source: MDPI journal article supplement (doi:10.3390/ijms242316944), 2023-11-29
Supplement: s1 [file s1]

**Table S1.** Oligonucleotide primers for qPCR analysis.

| Gene             | Forward primer           | Reverse primer           |
|------------------|--------------------------|--------------------------|
| <i>Sp7</i>       | CCCTTCTCAAGCACCAATGG     | AAGGGTGGGTAGTCATTTGCATA  |
| <i>Alpl</i>      | CTTGACTGTGGTTACTGCTGATCA | GTATCCACCGAATGTGAAAACGT  |
| <i>Opn</i>       | CTCCAATCGTCCCTACAGTCG    | CCAAGCTATCACCTCGGC       |
| <i>Ibsp</i>      | CCACACTTTCCACACTCTCG     | CGTCGCTTTCCTTCACTTTTG    |
| <i>Bglap</i>     | GCTGCCCTAAAGCCAACTCT     | AGAGGACAGGGAGGATCAAGTTC  |
| <i>Colla1</i>    | CCCAAGGAAAAGAAGCACGTC    | ACATTAGGCGCAGGAAGGTCA    |
| <i>Hhip</i>      | TCGAAACGGCTACTACACCC     | CTCGAACTGTCCCAGAAACT     |
| <i>Boc</i>       | GACGGCGGTATCCCTACTTG     | GTTCTTCCCAGCTTCTGGAC     |
| <i>Creb5</i>     | CACCCTCAGTCAGCTTACAA     | AAGGGTTGGGCTGGTAAGAA     |
| <i>Tnf</i>       | TTGTCTACTCCCAGGTTCTCT    | GAGGTTGACTTTCTCCTGGTATG  |
| <i>Csfl</i>      | ACCTGTTTCCCAAGAAGAGAGCCT | AGCTGTCAACACAAGCAGCCAAAG |
| <i>Csflr</i>     | TGGCATCTGGCTTAAGGTGAA    | GAATCCGCACCAGCTTGCTA     |
| <i>Tgfb1</i>     | GGTGGTATACTGAGACACCTTG   | CCCAAGGAAAGGTAGGTGATAG   |
| <i>Ctsk</i>      | AGGCATTGACTCTGAAGATGCT   | TCCCCACAGGAATCTCTCTG     |
| <i>Tnfsf11</i>   | CAAGCTCCGAGCTGGTGAAG     | CCTGAACTTTGAAAGCCCCA     |
| <i>Tnfrsf11b</i> | AAGAGCAAACCTTCCAGCTGC    | CACGCTGCTTTCACAGAGGTC    |
| <i>Nfatc</i>     | TGGGAGATGGAAGCAAAGAC     | ATAGAAACTGACTTGGACGGG    |
| <i>Gapdh</i>     | TGCACCACCAACTGCTTAG      | GGATGCAGGGATGATGTTC      |
